# Supplementary material for: Comparison of Efficacy of Lidocaine and Articaine as Inferior Alveolar Nerve Blocking Agents in Patients with Symptomatic Irreversible Pulpitis: Randomized Controlled Trial
Source: MDPI journal article supplement (doi:10.3390/medicina59101840), 2023-10-16
Supplement: s1 [file s1]

**Form S1**  
***PATIENT CONSENT PROFORMA***  
**ISLAMIC INTERNATIONAL DENTAL HOSPITAL**  
**DEPARTMENT OF OPERATIVE DENTISTRY**

1. It is to certify that I have been:

a) Informed thoroughly about the reasons for which my tooth needs root canal treatment

b) Informed about the potential risks and or side effects of the local anesthetics.

c) Told that this procedure is not only for the purpose of research to be conducted in the same hospital but it will also fulfill my treatment requirements

d) Informed that the confidentiality of the information will be maintained and safeguarded.

e) Satisfied by the doctor and all my queries have been answered thoroughly.

f) Assured that I am free to withdraw at any time without any comment, penalty or repercussions.

2. I also certify that the whole form has been read and explained to me in a language that I understand fully and I have agreed to participate in this study by my own free will.

Signature of the participant

Signature of the Doctor

Name

Address

No.

Contact

**Proforma S1**  
***DATA COLLECTION PROFORMA***  
**ISLAMIC INTERNATIONAL DENTAL HOSPITAL**  
**DEPARTMENT OF OPERATIVE DENTISTRY**

Name \_\_\_\_\_ Age \_\_\_\_\_ Gender \_\_\_\_\_

Tooth (Mark x against the appropriate box):

|                                           |  |                                          |  |
|-------------------------------------------|--|------------------------------------------|--|
| Mandibular Right 1 <sup>st</sup> Premolar |  | Mandibular Left 1 <sup>st</sup> Premolar |  |
| Mandibular Right 2 <sup>nd</sup> Premolar |  | Mandibular Left 2 <sup>nd</sup> Premolar |  |
| Mandibular Right 1 <sup>st</sup> Molar    |  | Mandibular Left 1 <sup>st</sup> Molar    |  |
| Mandibular Right 2 <sup>nd</sup> Molar    |  | Mandibular Left 2 <sup>nd</sup> Molar    |  |

I. Type of the anesthetic used: A ☐

B ☐

II. Level of pain experienced by the patient before administering the local anesthetic solution

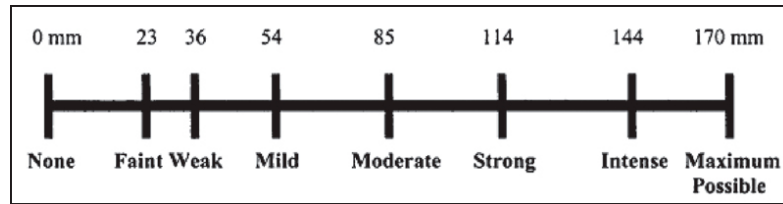

III. Level of pain experienced by the patient after administering the local anesthetic solution

IV. Signature of the patient

Signature of the doctor
